# Supplementary material for: Uveal Melanoma Cell Line Proliferation Is Inhibited by Ricolinostat, a Histone Deacetylase Inhibitor
Source: MDPI journal article supplement (doi:10.3390/cancers14030782), 2022-02-03
Supplement: s1 [file s1]

**Uveal Melanoma Cell Line Proliferation Is Inhibited by Ricolinostat, a Histone Deacetylase Inhibitor**

**Supplementary Figures and Tables**

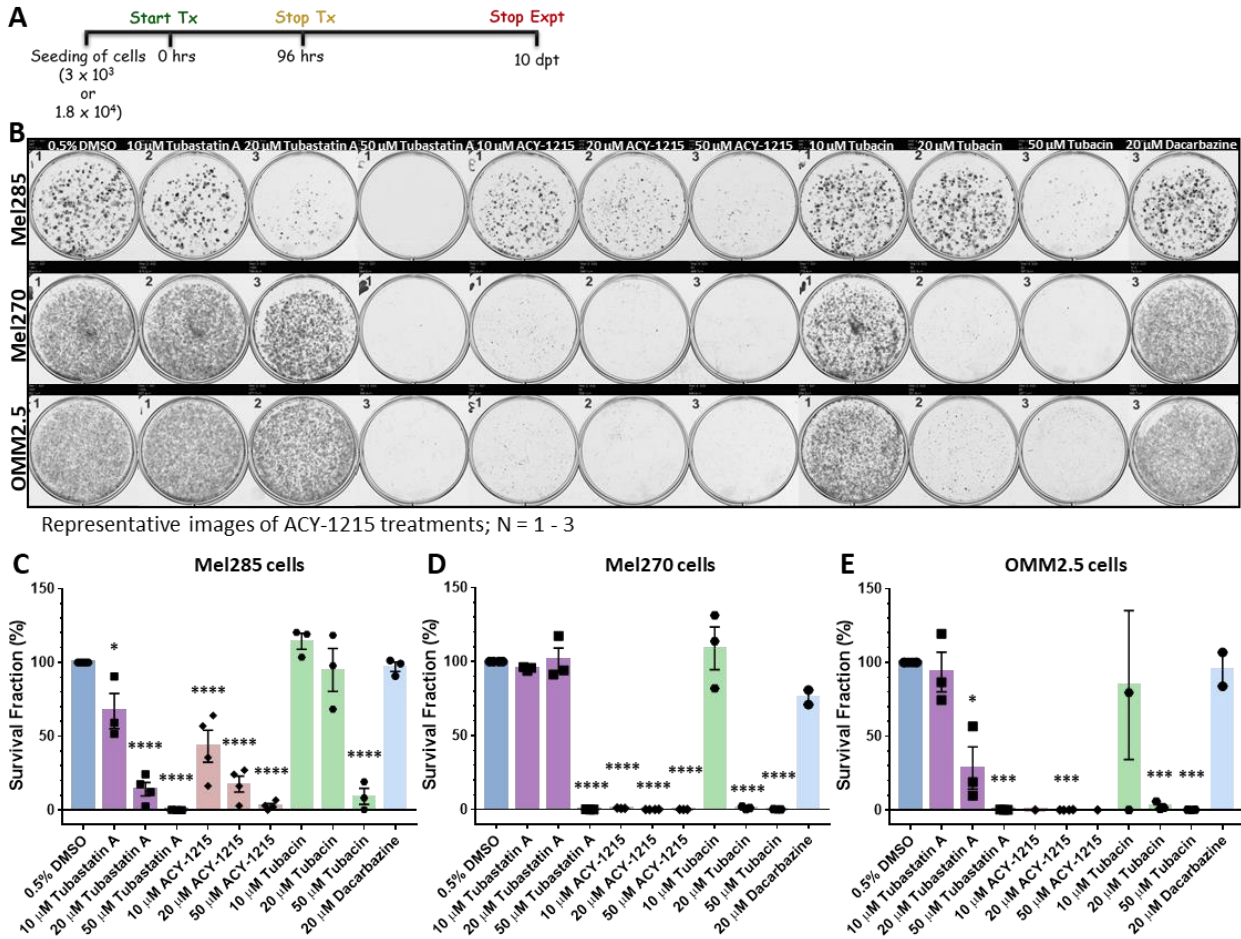

**Figure S1:** HDAC6 inhibitors present with anti-cancer activity in UM (Mel285, Mel270) and MUM (OMM2.5) cell lines. A: Schematic diagram illustrating treatment regime used. B: Representative image of clonogenic assay plates for Mel285 (top panel), Mel270 (middle panel) and OMM2.5 cells (bottom panel) treated with 0.5% DMSO, 10, 20 or 50  $\mu$ M Tubastatin A, 10, 20 or 50  $\mu$ M ACY-1215, 10, 20 or 50  $\mu$ M Tubacin or 20  $\mu$ M Dacarbazine for 96 hours. C, D and E: A dose-dependent decrease in surviving fraction of colonies was observed across the three different HDAC6i tested in comparison to 0.5% DMSO treatment. Percentage of surviving colonies was comparable between 20  $\mu$ M Dacarbazine and 0.5% DMSO treatment group. One-way ANOVA with Dunnett's Test for Multiple Comparisons statistical analysis was performed, error bars represent mean  $\pm$  SEM, \*\*\*\*p = 0.0001 (N = 2 - 4).

**A ACY-1215**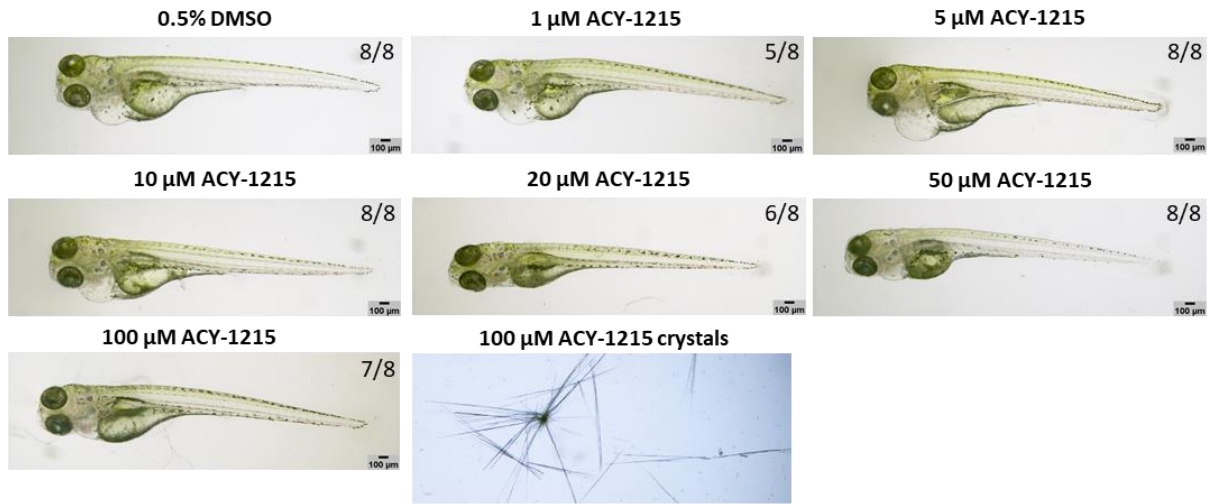**B Dacarbazine**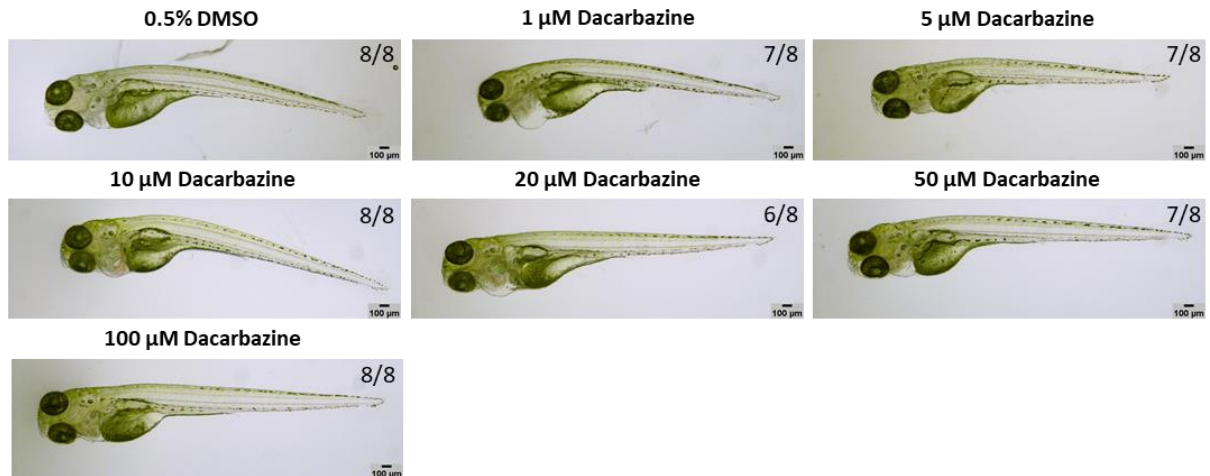

**Figure S2:** Toxicity effects of ACY-1215 and Dacarbazine in zebrafish larvae. A and B: Increasing doses of ACY-1215 and Dacarbazine, up to 100  $\mu$ M, are well tolerated by 5 days (3 days post treated) old *Tg(fli1a:EGFP)* zebrafish larvae ( $n = 8$  per treatment group). Drug crystals were observed to form at 100  $\mu$ M ACY-1215.

**A**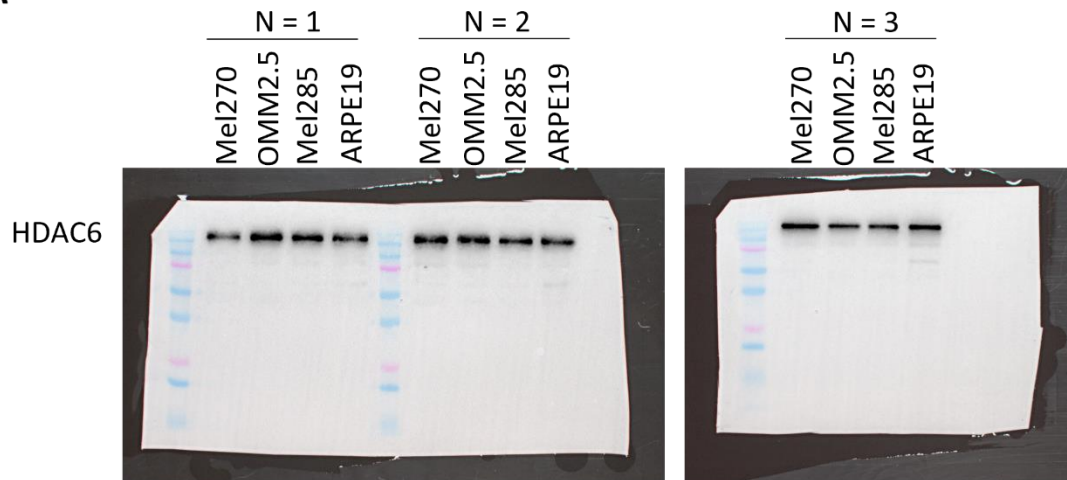**B**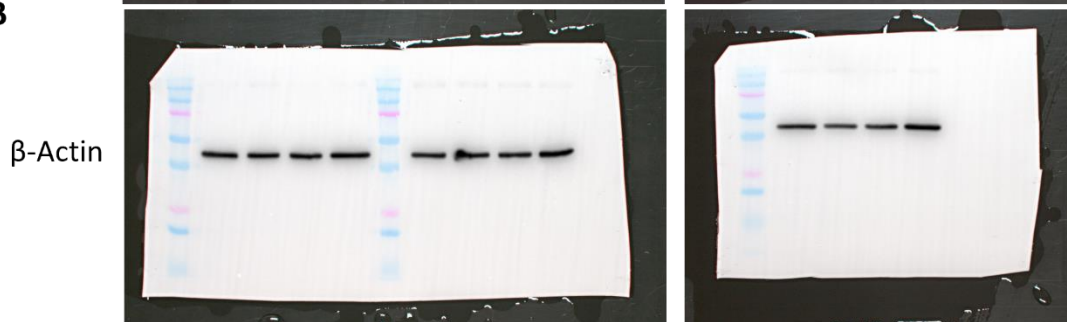

**Figure S3:** Raw Western blot images for HDAC6 expression in UM and MUM cells. A: HDAC6 expression in UM (Mel270, Mel285) and mUM (OMM2.5) cells, is comparable to ARPE19 cells (N = 3). B:  $\beta$ -actin was used as loading control.

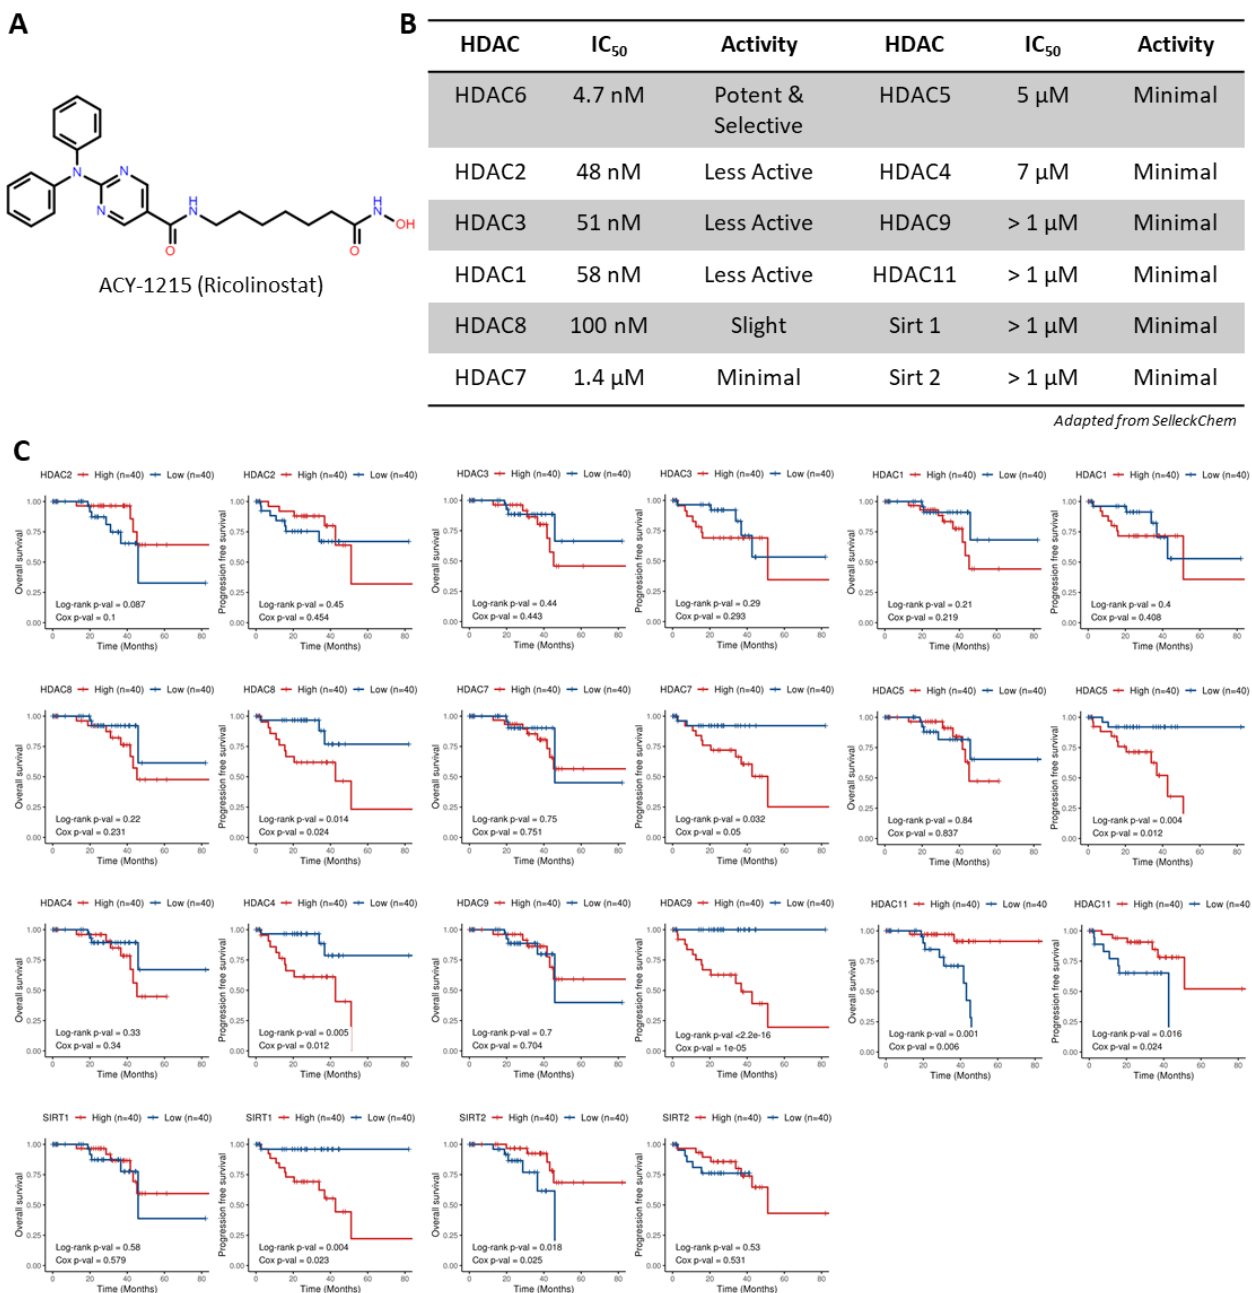

**Figure S4:** Potential off-target effects of ACY-1215 on HDAC isozymes. A: Chemical structure of ACY-1215 drawn using ChemSpider. B: Table highlighting ACY-1215 IC<sub>50</sub> values against various HDAC isozymes. C: Kaplan-Meier survival curves demonstrating correlation between expression of various HDAC isoforms and overall survival (OS) or progression free survival (PFS) in UM patients. Median values were used as cut-off for high (red) and low (blue) expression levels, with Log-rank *p*-values (categorical variable) and Cox *p*-values (continuous variable) calculated (n = 80).

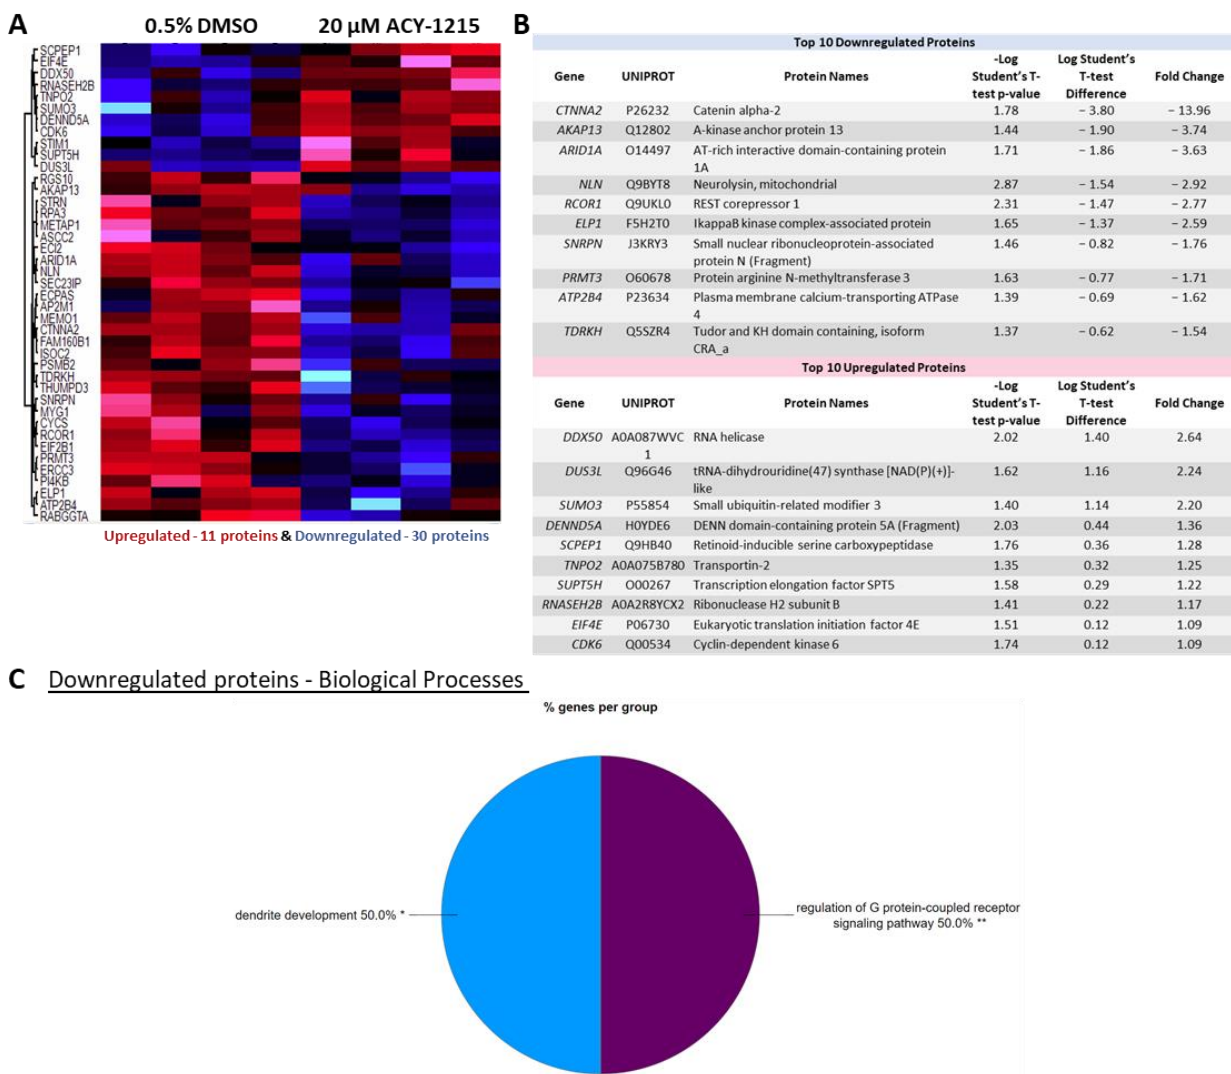

**Figure S5:** Proteome profile of OMM2.5 cells treated with ACY-1215 for 4 hours. A: Heat map presenting significantly differentially expressed proteins after 4 hours of 20  $\mu$ M ACY-1215 treatment in OMM2.5 cells. 30 (blue) proteins were downregulated, and 11 (red) proteins were upregulated (N = 4). B: Table showing the top 10 down- and up-regulated proteins at 4 hours. C: Enriched protein pathway analysis for GO term: biological processes, identified dendrite development and regulation of G protein-coupled receptor signaling pathway to be significantly downregulated.



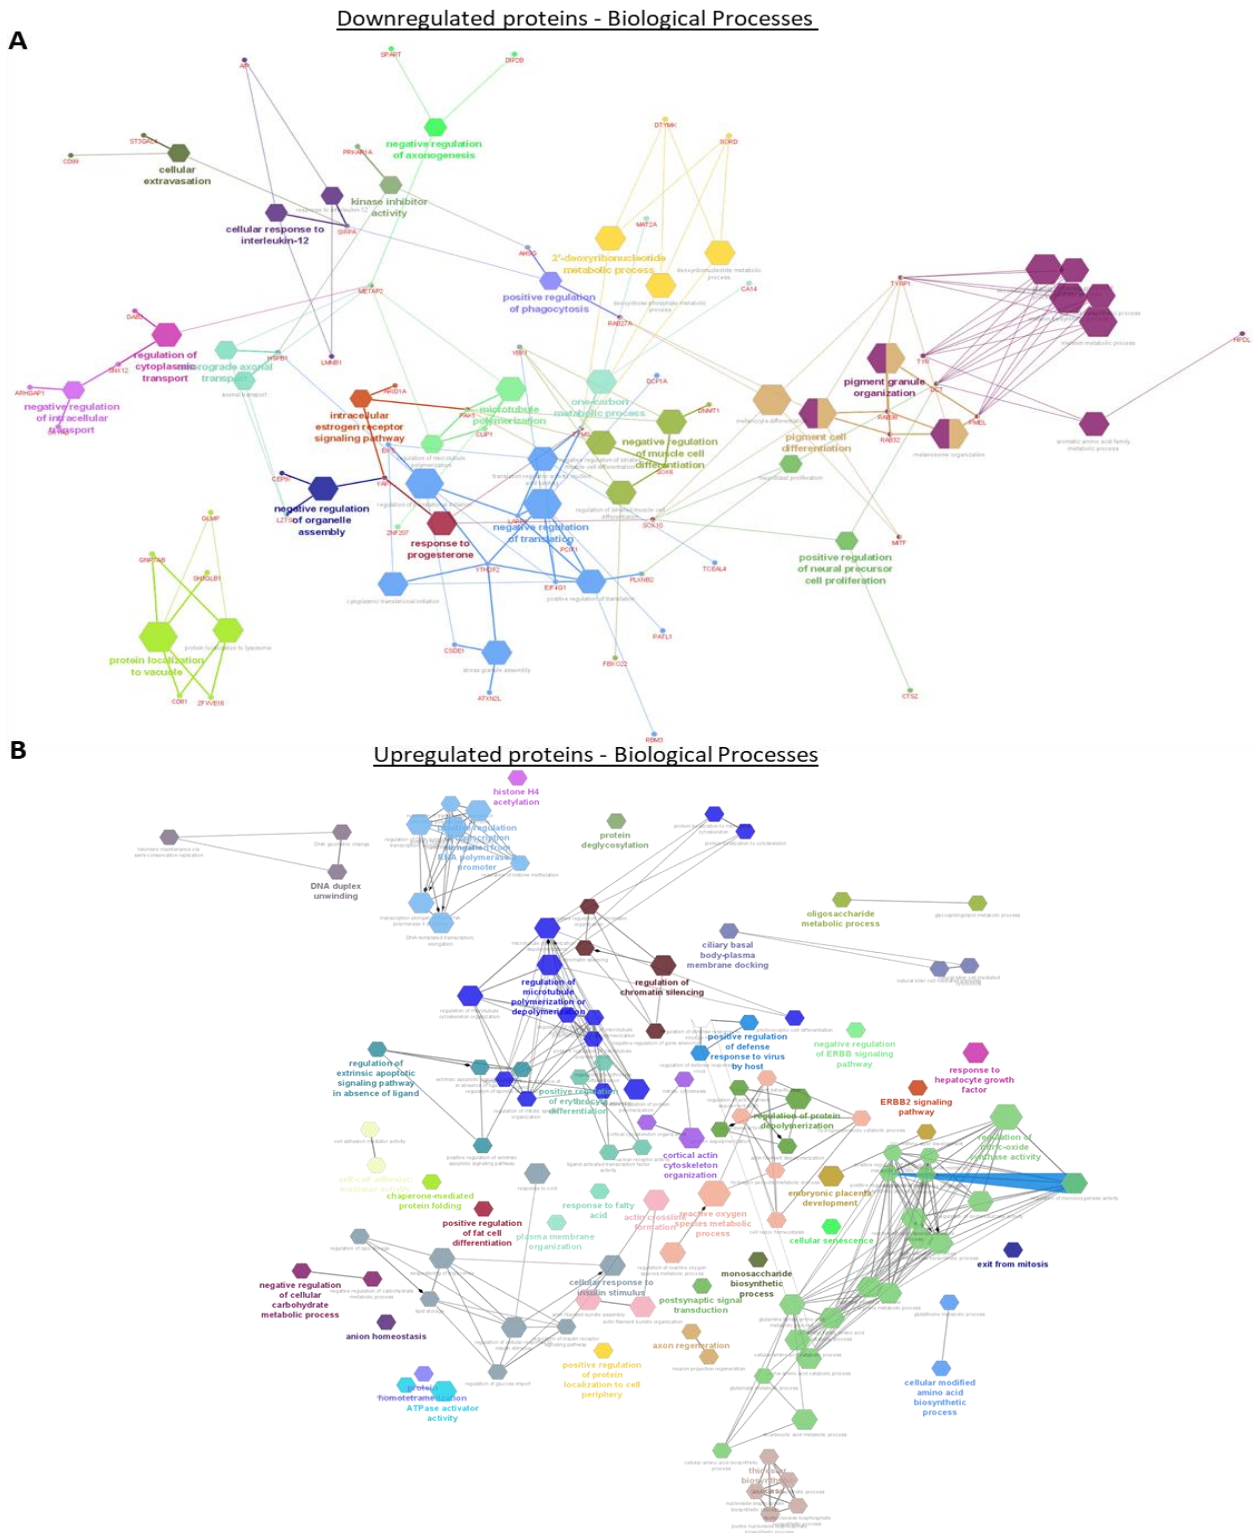

**Figure S6:** GO: Biological processes pathway analysis map of down- and up-regulated proteins following ACY-1215 treatment for 24 hours.

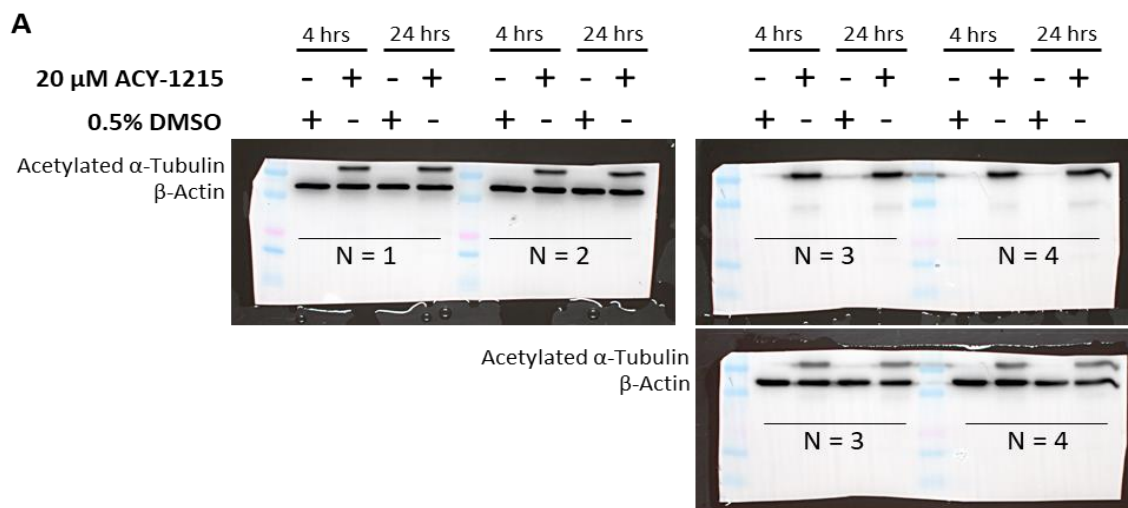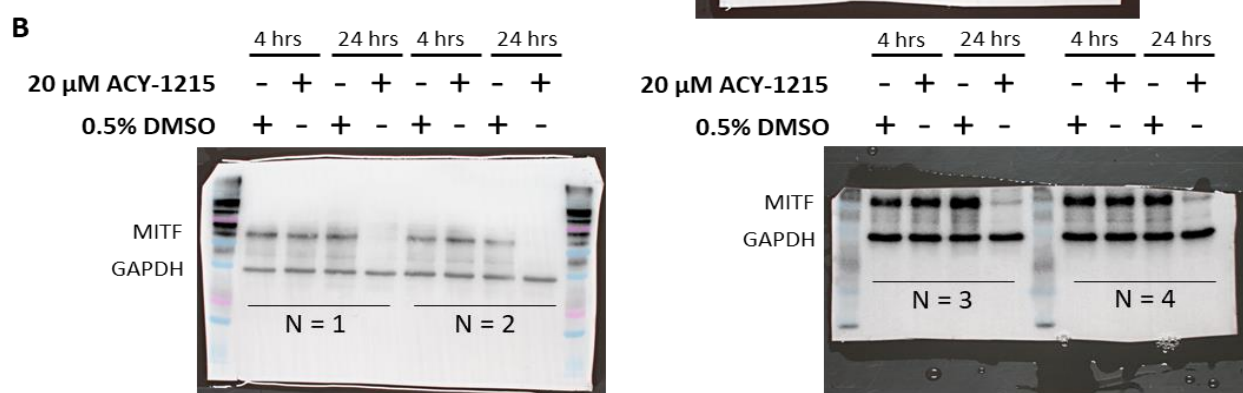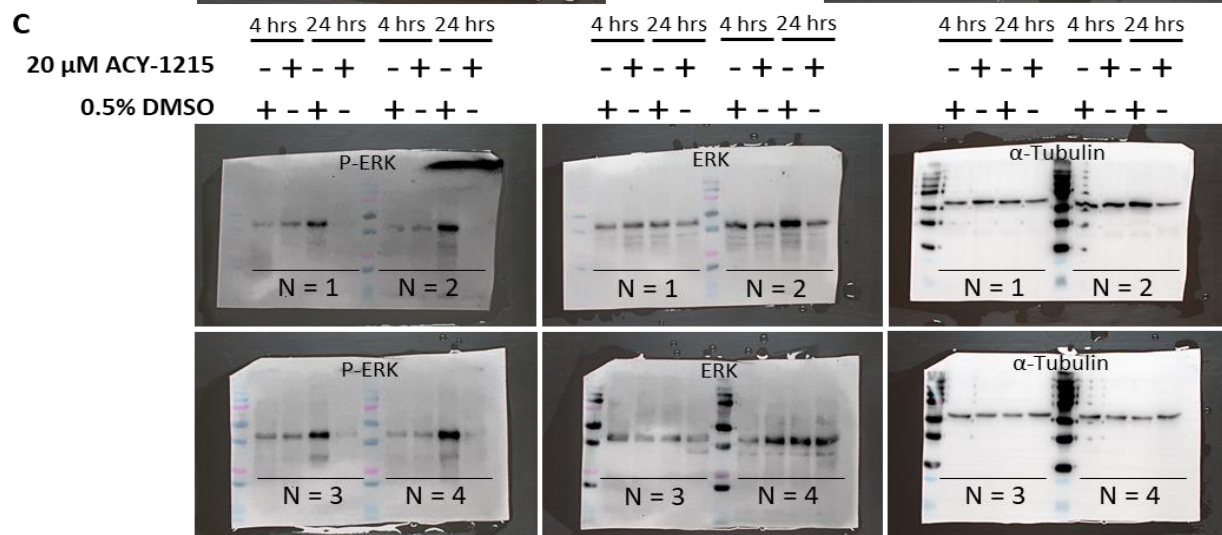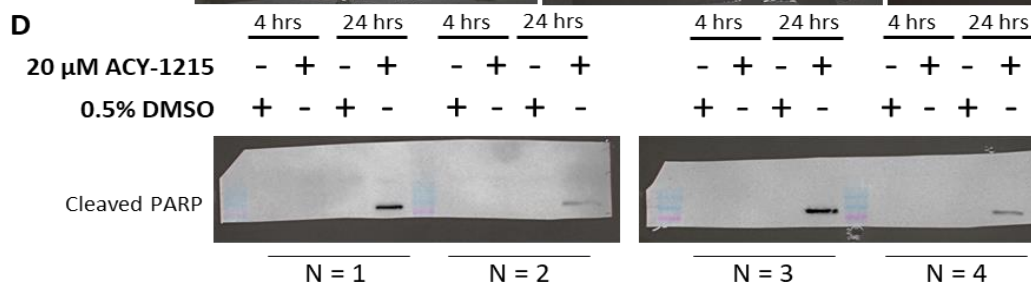



**Figure S7:** Raw Western blot images for acetylated  $\alpha$ -tubulin, MITF, p-ERK, ERK and cleaved PARP expression in ACY-1215 treated OMM2.5 cells. A: Acetylated  $\alpha$ -tubulin expression is upregulated after 4 and 24 hours of 20  $\mu$ M ACY-1215 treatment in OMM2.5 cells. B: MITF expression remained unchanged after 4 hours of 20  $\mu$ M ACY-1215 treatment. 24 hours of 20  $\mu$ M ACY-1215 resulted in a significant reduction in MITF expression levels compared to vehicle control. C: p-ERK/Total ERK expression levels not altered following 4 hours of treatment with 20  $\mu$ M ACY-1215. 20  $\mu$ M ACY-1215 treatment for 24 hours led to a significant reduction in p-ERK expression levels, in comparison to vehicle control. D: Cleaved PARP expression was upregulated in OMM2.5 cells 24 hours post treated with 20  $\mu$ M ACY-1215.  $\beta$ -actin,  $\alpha$ -tubulin and GAPDH were used as loading control (N = 4).

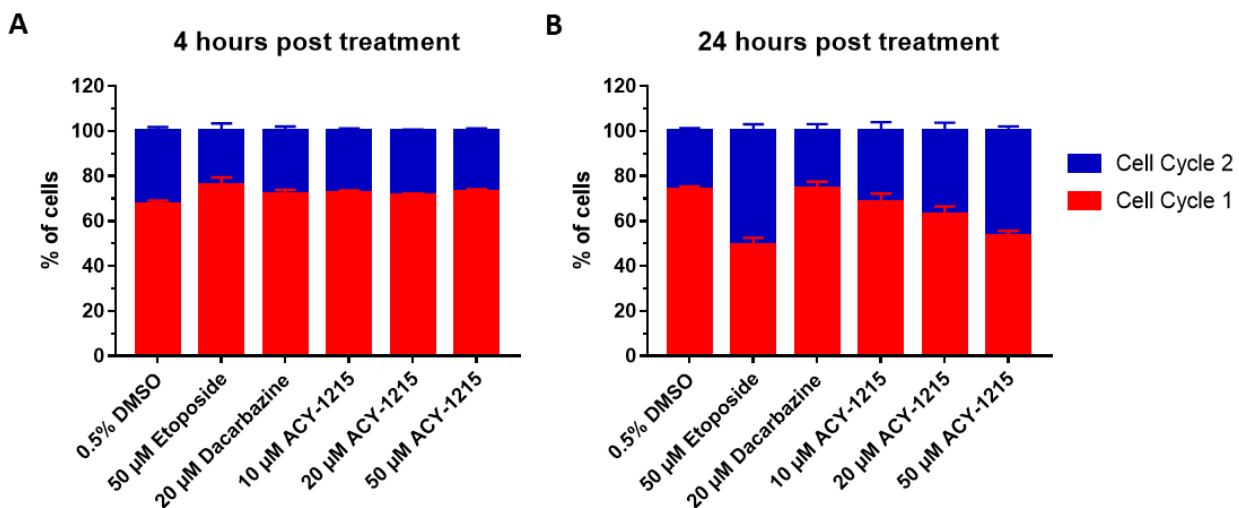

**Figure S8:** DNA ploidy in OMM2.5 cells. A and B: OMM2.5 cells display DNA ploidy as presented by the two cell cycle populations observed (N = 4). Error bars indicate mean  $\pm$  SEM (N = 3)

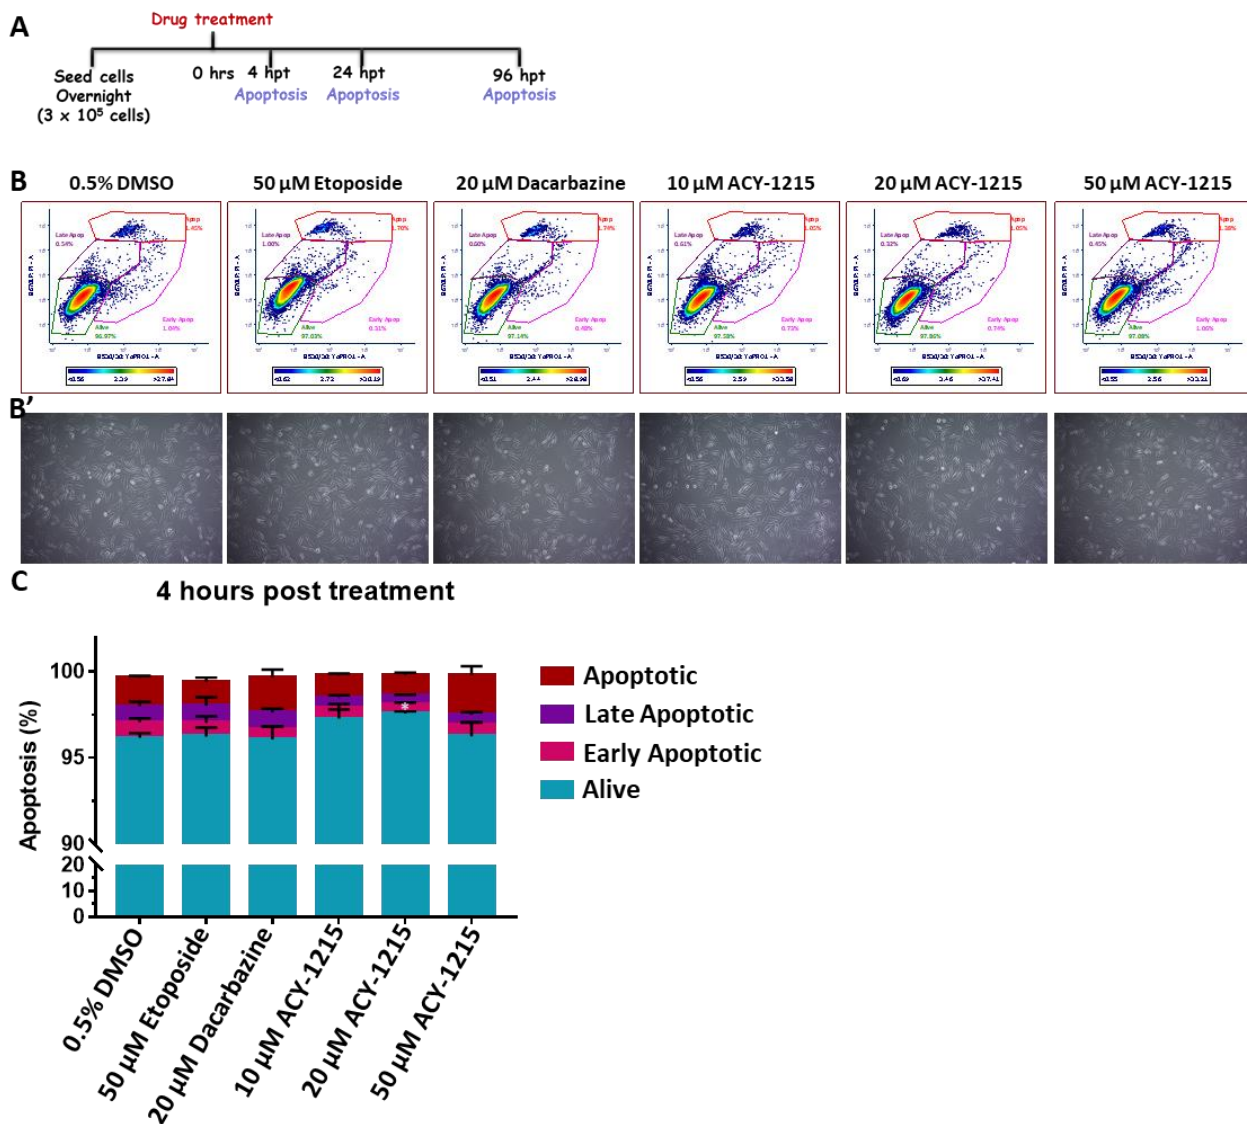

**Figure S9:** 4 hours ACY-1215 treatment did not have a profound effect on apoptosis pathway in OMM2.5 cells. A: Illustration of treatment regime. B: Representative plots of treated OMM2.5 cell singlets gating in different stages of apoptosis. B': Micrographs corresponding to OMM2.5 drug treatment groups at 4 hours. C: No change was observed in live, early, late and apoptotic cell populations following treatment with Etoposide and all concentrations of ACY-1215 treatment. On average, a significant increase in percentage of live cells was detected following 20  $\mu$ M ACY-1215 (\*,  $p = 0.03$ ) treatment compared to 0.5% DMSO treatment. Two-way ANOVA followed by Tukey's Multiple Comparisons statistical test was performed, error bars show mean  $\pm$  SEM (N = 3).

## Supplementary Fig 10: Toxicity screen in zebrafish

### A ML329

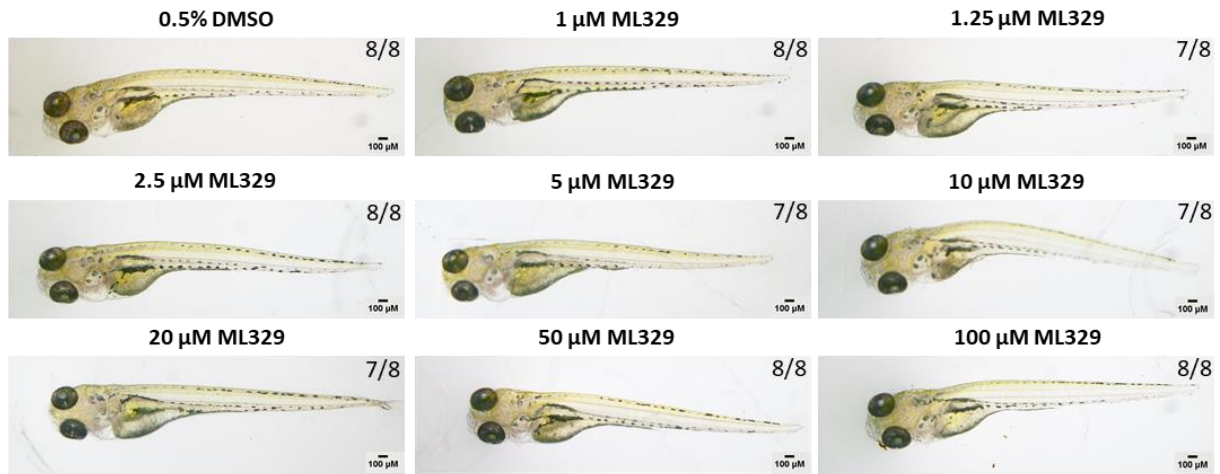

### B

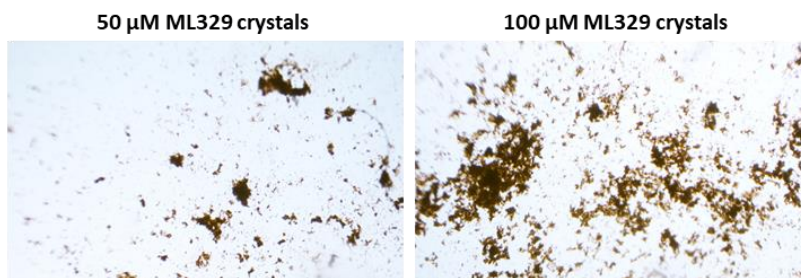

**Figure S10:** Toxicity screen of ML329 in zebrafish larvae. A: Increasing doses of ML329, up to 100  $\mu$ M, was well tolerated by 5 days (3 days post treated) old *Tg(fli1a:EGFP)* zebrafish larvae (n = 8 per treatment group). B: Drug precipitates observed in embryo media at 50 and 100  $\mu$ M ML329 concentrations 3 days post treatment.

**Table S1:** List of downregulated proteins and associated pathways after 24 hours of ACY-1215 treatment.

| ID         | Term                                                        | Associated Genes Found                   |
|------------|-------------------------------------------------------------|------------------------------------------|
| GO:0019210 | Kinase inhibitor activity                                   | AHSG, HSPB1, PRKAR1A                     |
| GO:0050771 | Negative regulation of axonogenesis                         | DIP2B, METAP2, SPART                     |
| GO:0006730 | One-carbon metabolic process                                | CA14, MAT2A, TYMS                        |
| GO:1902116 | Negative regulation of organelle assembly                   | CEP97, LZTS1, YAP1                       |
| GO:1903649 | Regulation of cytoplasmic transport                         | DAB2, METAP2, SNX12                      |
| GO:0030520 | Intracellular estrogen receptor signaling pathway           | ARID1A, PAK1, YAP1                       |
| GO:0032387 | Negative regulation of intracellular transport              | ARHGAP1, CRYAB, SNX12                    |
| GO:0032570 | Response to progesterone                                    | SOX10, TYMS, YAP1                        |
| GO:0045123 | Cellular extravasation                                      | CD99, SIRPA, ST3GAL4                     |
| GO:0050766 | Positive regulation of phagocytosis                         | AHSG, RAB27A, SIRPA                      |
| GO:0070671 | Response to interleukin-12                                  | AIP, LMNB1, SIRPA                        |
| GO:0071349 | Cellular response to interleukin-12                         | AIP, LMNB1, SIRPA                        |
| GO:0072665 | Protein localization to vacuole                             | CD81, GLMP, GNPTAB, SH3GLB1, ZFYVE16     |
| GO:0061462 | Protein localization to lysosome                            | CD81, GLMP, GNPTAB, ZFYVE16              |
| GO:0098930 | Axonal transport                                            | HSPB1, LZTS1, METAP2                     |
| GO:0008089 | Anterograde axonal transport                                | HSPB1, LZTS1, METAP2                     |
| GO:2000179 | Positive regulation of neural precursor cell proliferation  | CTS2, DCT, SOX10                         |
| GO:0007405 | Neuroblast proliferation                                    | DCT, PLXNB2, SOX10                       |
| GO:0046785 | Microtubule polymerization                                  | CLIP1, METAP2, PAK1, ZNF207              |
| GO:0031113 | Regulation of microtubule polymerization                    | CLIP1, METAP2, PAK1                      |
| GO:0019692 | Deoxyribose phosphate metabolic process                     | DTYMK, SORD, TYMS                        |
| GO:0009262 | Deoxyribonucleotide metabolic process                       | DTYMK, SORD, TYMS                        |
| GO:0009394 | 2'-deoxyribonucleotide metabolic process                    | DTYMK, SORD, TYMS                        |
| GO:0051148 | Negative regulation of muscle cell differentiation          | DNMT1, PAK1, SOX6, YBX1                  |
| GO:0051153 | Regulation of striated muscle cell differentiation          | FBXO22, PAK1, SOX6, YBX1                 |
| GO:0051154 | Negative regulation of striated muscle cell differentiation | PAK1, SOX6, YBX1                         |
| GO:0050931 | Pigment cell differentiation                                | MITF, RAB27A, RAB32, RAB38, SOX10, TYRP1 |
| GO:0030318 | Melanocyte differentiation                                  | MITF, RAB27A, SOX10, TYRP1               |



| ID         | Term                                                 | Associated Genes Found                                 |
|------------|------------------------------------------------------|--------------------------------------------------------|
| GO:0048753 | Pigment granule organization                         | PMEL, RAB32, RAB38, TYRP1                              |
| GO:0032438 | Melanosome organization                              | PMEL, RAB32, RAB38, TYRP1                              |
| GO:0034063 | Stress granule assembly                              | ATXN2L, CSDE1, YTHDF2                                  |
| GO:0006446 | Regulation of translational initiation               | CSDE1, EIF4G1, EIF5, HSPB1, LARP1, THDF2               |
| GO:0002183 | Cytoplasmic translational initiation                 | EIF4G1, EIF5, YTHDF2                                   |
| GO:0017148 | Negative regulation of translation                   | DCP1A, EIF4G1, LARP1, PATL1, PCIF1, TYMS, YBX1, YTHDF2 |
| GO:0045727 | Positive regulation of translation                   | EIF4G1, LARP1, PCIF1, PLXNB2, RBM3, YTHDF2             |
| GO:0090079 | Translation regulator activity, nucleic acid binding | EIF4G1, EIF5, LARP1, TCEAL4, TYMS                      |
| GO:0044550 | Secondary metabolite biosynthetic process            | DCT, PMEL, TYR, TYRP1                                  |
| GO:0046148 | Pigment biosynthetic process                         | DCT, PMEL, TYR, TYRP1                                  |
| GO:0050931 | Pigment cell differentiation                         | MITF, RAB27A, RAB32, RAB38, SOX10, TYRP1               |
| GO:0006582 | Melanin metabolic process                            | DCT, PMEL, TYR, TYRP1                                  |
| GO:0009072 | Aromatic amino acid family metabolic process         | DCT, HPDL, TYR                                         |
| GO:0048753 | Pigment granule organization                         | PMEL, RAB32, RAB38, TYRP1                              |
| GO:0042438 | Melanin biosynthetic process                         | DCT, PMEL, TYR, TYRP1                                  |
| GO:0046189 | Phenol-containing compound biosynthetic process      | DCT, PMEL, TYR, TYRP1                                  |
| GO:0032438 | Melanosome organization                              | PMEL, RAB32, RAB38, TYRP1                              |

**Table S2:** List of upregulated proteins and associated pathways following ACY-1215 treatment for 24 hours.

| ID         | Term                                                           | Associated Genes Found                          |
|------------|----------------------------------------------------------------|-------------------------------------------------|
| Go:0006517 | Protein deglycosylation                                        | MAN2B1, OS9, SEL1L                              |
| Go:0090398 | Cellular senescence                                            | ARG2, MAP2K1, PAWR                              |
| Go:0007009 | Plasma membrane organization                                   | AHNAK2, BAIAP2L1, NDRG1, PRDX6, RAB3A, SLC9A3R1 |
| Go:0010458 | Exit from mitosis                                              | ANLN, EPS8, UBE2S                               |
| Go:0035728 | Response to hepatocyte growth factor                           | CRK, GCLC, LGMN                                 |
| Go:0038128 | ErbB2 signaling pathway                                        | CDC37, GRB2, HSP90AA1                           |
| Go:0043967 | Histone h4 acetylation                                         | HAT1, IWS1, RUVBL1                              |
| Go:0045600 | Positive regulation of fat cell differentiation                | AAMDC, LCP1, STK4, SYAP1                        |
| Go:0046364 | Monosaccharide biosynthetic process                            | ALDOC, G6PD, GOT1, SDHAF3, STK4                 |
| Go:0051289 | Protein homotetramerization                                    | ACOT13, GLS, TK1                                |
| Go:0055081 | Anion homeostasis                                              | ENPP1, GLS, SLC9A3R1                            |
| Go:0061077 | Chaperone-mediated protein folding                             | DNAJB1, HSPA1A, SGTB                            |
| Go:0070542 | Response to fatty acid                                         | CAT, CCN2, LCP1                                 |
| Go:0098926 | Postsynaptic signal transduction                               | KPNA2, RGS10, STAT3                             |
| Go:1901185 | Negative regulation of erbB signaling pathway                  | GRB2, LGMN, MVP                                 |
| Go:1904377 | Positive regulation of protein localization to cell periphery  | ACSL3, EPB41L2, SORBS1                          |
| Go:0009311 | Oligosaccharide metabolic process                              | GLA, MAN2B1, NEU1                               |
| Go:0006687 | Glycosphingolipid metabolic process                            | ARSA, GLA, NEU1                                 |
| Go:0031102 | Neuron projection regeneration                                 | CTNNA1, DHFR, MAP2K1                            |
| Go:0031103 | Axon regeneration                                              | CTNNA1, DHFR, MAP2K1                            |
| Go:0006749 | Glutathione metabolic process                                  | G6PD, GCLC, GGCT                                |
| Go:0042398 | Cellular modified amino acid biosynthetic process              | DHFR, GCLC, GGCT                                |
| Go:0045912 | Negative regulation of carbohydrate metabolic process          | ENPP1, STAT3, STK4                              |
| Go:0010677 | Negative regulation of cellular carbohydrate metabolic process | ENPP1, STAT3, STK4                              |
| Go:0060590 | Atpase regulator activity                                      | ATP1B1, DNAJB1, RAB3A                           |
| Go:0001671 | Atpase activator activity                                      | ATP1B1, DNAJB1, RAB3A                           |
| Go:0001892 | Embryonic placenta development                                 | CCN1, GRB2, MAP2K1, MIA3, STK4                  |
| Go:0060711 | Labyrinthine layer development                                 | CCN1, GRB2, MAP2K1                              |

| ID         | Term                                                                     | Associated Genes Found                          |
|------------|--------------------------------------------------------------------------|-------------------------------------------------|
| Go:0098631 | Cell adhesion mediator activity                                          | BAIAP2L1, CXADR, PDLIM5                         |
| Go:0098632 | Cell-cell adhesion mediator activity                                     | BAIAP2L1, CXADR, PDLIM5                         |
| Go:0000281 | Mitotic cytokinesis                                                      | ANLN, ARL3, RACGAP1                             |
| Go:0030866 | Cortical actin cytoskeleton organization                                 | ANLN, EPB41L2, LCP1, RACGAP1                    |
| Go:0030865 | Cortical cytoskeleton organization                                       | ANLN, EPB41L2, LCP1, RACGAP1                    |
| Go:0032201 | Telomere maintenance via semi-conservative replication                   | BLM, RFC1, RFC4                                 |
| Go:0032392 | Dna geometric change                                                     | BLM, CETN2, MNAT1, RFC4, RUVBL1                 |
| Go:0032508 | Dna duplex unwinding                                                     | BLM, CETN2, MNAT1, RFC4, RUVBL1                 |
| Go:0002228 | Natural killer cell mediated immunity                                    | CRK, PRDX1, TUBB2A, TUBB4B                      |
| Go:0042267 | Natural killer cell mediated cytotoxicity                                | CRK, PRDX1, TUBB2A, TUBB4B                      |
| Go:0097711 | Ciliary basal body-plasma membrane docking                               | CEP131, CETN2, HSP90AA1, TUBB2A, TUBB4B         |
| Go:0050688 | Regulation of defense response to virus                                  | HSP90AA1, SIN3A, TOMM70                         |
| Go:0050691 | Regulation of defense response to virus by host                          | HSP90AA1, SIN3A, TOMM70                         |
| Go:0002230 | Positive regulation of defense response to virus by host                 | HSP90AA1, SIN3A, TOMM70                         |
| Go:0051764 | Actin crosslink formation                                                | BAIAP2L1, EPS8, LCP1                            |
| Go:0061572 | Actin filament bundle organization                                       | BAIAP2L1, CCN2, EPS8, LCP1, LIMA1, PAWR, SORBS1 |
| Go:0051017 | Actin filament bundle assembly                                           | BAIAP2L1, CCN2, EPS8, LCP1, LIMA1, PAWR, SORBS1 |
| Go:0060969 | Negative regulation of gene silencing                                    | ATAD2, H1-10, STAT3                             |
| Go:1905268 | Negative regulation of chromatin organization                            | ATAD2, H1-10, SIN3A, SUPT6H                     |
| Go:0006342 | Chromatin silencing                                                      | ATAD2, H1-10, HAT1, SIN3A                       |
| Go:0031935 | Regulation of chromatin silencing                                        | ATAD2, H1-10, SIN3A                             |
| Go:0038034 | Signal transduction in absence of ligand                                 | CTNNA1, HSPA1A, PPP2R1B                         |
| Go:0097192 | Extrinsic apoptotic signaling pathway in absence of ligand               | CTNNA1, HSPA1A, PPP2R1B                         |
| Go:2001238 | Positive regulation of extrinsic apoptotic signaling pathway             | CTNNA1, PPP2R1B, STK4                           |
| Go:2001239 | Regulation of extrinsic apoptotic signaling pathway in absence of ligand | CTNNA1, HSPA1A, PPP2R1B                         |
| Go:0098531 | Ligand-activated transcription factor activity                           | MIA3, NR4A1, STAT3                              |
| Go:0045646 | Regulation of erythrocyte differentiation                                | HSPA1A, MIA3, STAT3                             |
| Go:0045648 | Positive regulation of erythrocyte differentiation                       | HSPA1A, MIA3, STAT3                             |
| Go:0004879 | Nuclear receptor activity                                                | MIA3, NR4A1, STAT3                              |

| ID         | Term                                                                            | Associated Genes Found                                                   |
|------------|---------------------------------------------------------------------------------|--------------------------------------------------------------------------|
| Go:1901879 | Regulation of protein depolymerization                                          | CKAP2, DSTN, EPS8, LIMA1, METAP1                                         |
| Go:0051261 | Protein depolymerization                                                        | CKAP2, DSTN, EPS8, LIMA1, METAP1                                         |
| Go:0030042 | Actin filament depolymerization                                                 | DSTN, EPS8, LIMA1                                                        |
| Go:0030834 | Regulation of actin filament depolymerization                                   | DSTN, EPS8, LIMA1                                                        |
| Go:0035384 | Thioester biosynthetic process                                                  | ACSL3, GCDH, PDP1                                                        |
| Go:0033866 | Nucleoside bisphosphate biosynthetic process                                    | ACSL3, GCDH, PDP1                                                        |
| Go:0034033 | Purine nucleoside bisphosphate biosynthetic process                             | ACSL3, GCDH, PDP1                                                        |
| Go:0034030 | Ribonucleoside bisphosphate biosynthetic process                                | ACSL3, GCDH, PDP1                                                        |
| Go:0071616 | Acyl-coa biosynthetic process                                                   | ACSL3, GCDH, PDP1                                                        |
| Go:0032968 | Positive regulation of transcription elongation from RNA polymerase ii promoter | BRD4, GTF2F1, SUPT6H                                                     |
| Go:0006354 | DNA-templated transcription, elongation                                         | BRD4, GTF2F1, HTATSF1, IWS1, MNAT1, SUPT6H                               |
| Go:0031060 | Regulation of histone methylation                                               | BRD4, IWS1, SUPT6H                                                       |
| Go:0032784 | Regulation of DNA-templated transcription, elongation                           | BRD4, GTF2F1, HTATSF1, SUPT6H                                            |
| Go:0006368 | Transcription elongation from rna polymerase ii promoter                        | BRD4, GTF2F1, IWS1, MNAT1, SUPT6H                                        |
| Go:0032786 | Positive regulation of dna-templated transcription, elongation                  | BRD4, GTF2F1, SUPT6H                                                     |
| Go:0034243 | Regulation of transcription elongation from rna polymerase ii promoter          | BRD4, GTF2F1, SUPT6H                                                     |
| Go:0072593 | Reactive oxygen species metabolic process                                       | ARG2, CAT, CBR1, CCN1, CCN2, DHFR, G6PD, GRB2, NQO2, PRDX1, PRDX6, STAT3 |
| Go:0042743 | Hydrogen peroxide metabolic process                                             | CAT, PRDX1, PRDX6, STAT3                                                 |
| Go:0045454 | Cell redox homeostasis                                                          | GCLC, PRDX1, PRDX6                                                       |
| Go:0042744 | Hydrogen peroxide catabolic process                                             | CAT, PRDX1, PRDX6                                                        |
| Go:0098869 | Cellular oxidant detoxification                                                 | CAT, DHFR, MAPRE2, PRDX1, PRDX6                                          |
| Go:2000377 | Regulation of reactive oxygen species metabolic process                         | ARG2, CBR1, DHFR, G6PD, GRB2, NQO2, STAT3                                |
| Go:0004601 | Peroxidase activity                                                             | CAT, MAPRE2, PRDX1, PRDX6                                                |
| Go:0009409 | Response to cold                                                                | ATP2B1, HSP90AA1, LCP1, VGF                                              |
| Go:0019915 | Lipid storage                                                                   | EHD1, ENPP1, LCP1, OSBPL8                                                |
| Go:0010883 | Regulation of lipid storage                                                     | EHD1, LCP1, OSBPL8                                                       |
| Go:0030730 | Sequestering of triglyceride                                                    | ENPP1, LCP1, OSBPL8                                                      |

| ID         | Term                                                                  | Associated Genes Found                                                 |
|------------|-----------------------------------------------------------------------|------------------------------------------------------------------------|
| Go:1900076 | Regulation of cellular response to insulin stimulus                   | ATP2B1, ENPP1, LCP1, OSBPL8, SORBS1                                    |
| Go:0032869 | Cellular response to insulin stimulus                                 | ATP2B1, BAIAP2L1, ENPP1, GCLC, GOT1, GRB2, LCP1, OSBPL8, SORBS1, SYAP1 |
| Go:0046626 | Regulation of insulin receptor signaling pathway                      | BAIAP2L1, ENPP1, OSBPL8, SORBS1                                        |
| Go:0046324 | Regulation of glucose import                                          | ENPP1, OSBPL8, SORBS1                                                  |
| Go:0031109 | Microtubule polymerization or depolymerization                        | ARL3, CKAP2, HSPA1A, MAPRE2, METAP1, NDRG1                             |
| Go:0070507 | Regulation of microtubule cytoskeleton organization                   | ARL3, CKAP2, HSPA1A, MAPRE2, METAP1, NDRG1, TACC3                      |
| Go:0044380 | Protein localization to cytoskeleton                                  | CEP131, MAPRE2, METAP1                                                 |
| Go:0090224 | Regulation of spindle organization                                    | HSPA1A, NDRG1, TACC3                                                   |
| Go:0031110 | Regulation of microtubule polymerization or depolymerization          | ARL3, CKAP2, HSPA1A, MAPRE2, METAP1, NDRG1                             |
| Go:0031112 | Positive regulation of microtubule polymerization or depolymerization | ARL3, HSPA1A, NDRG1                                                    |
| Go:0031113 | Regulation of microtubule polymerization                              | ARL3, HSPA1A, NDRG1                                                    |
| Go:0032273 | Positive regulation of protein polymerization                         | ARFIP1, ARL3, BAIAP2L1, GRB2, HSP90AA1, HSPA1A, NDRG1                  |
| Go:0060236 | Regulation of mitotic spindle organization                            | HSPA1A, NDRG1, TACC3                                                   |
| Go:0072698 | Protein localization to microtubule cytoskeleton                      | CEP131, MAPRE2, METAP1                                                 |
| Go:0090307 | Mitotic spindle assembly                                              | HSPA1A, NDRG1, RACGAP1                                                 |
| Go:0046530 | Photoreceptor cell differentiation                                    | ARL3, MAPRE2, STAT3                                                    |
| Go:0031116 | Positive regulation of microtubule polymerization                     | ARL3, HSPA1A, NDRG1                                                    |
| Go:2001057 | Reactive nitrogen species metabolic process                           | ARG2, DDAH1, DDAH2, GLA, HSP90AA1                                      |
| Go:0046209 | Nitric oxide metabolic process                                        | ARG2, DDAH1, DDAH2, GLA, HSP90AA1                                      |
| Go:0051341 | Regulation of oxidoreductase activity                                 | DDAH1, DDAH2, DHFR, GLA, HSP90AA1, NOSIP, PDP1                         |
| Go:0080164 | Regulation of nitric oxide metabolic process                          | DDAH1, DDAH2, GLA, HSP90AA1                                            |
| Go:0006809 | Nitric oxide biosynthetic process                                     | ARG2, DDAH1, DDAH2, GLA, HSP90AA1                                      |
| Go:0032768 | Regulation of monooxygenase activity                                  | DDAH1, DDAH2, DHFR, GLA, HSP90AA1, NOSIP                               |
| Go:1904407 | Positive regulation of nitric oxide metabolic process                 | DDAH1, DDAH2, HSP90AA1                                                 |
| Go:0008652 | Cellular amino acid biosynthetic process                              | DHFR, GLS, GOT1                                                        |
| Go:0009063 | Cellular amino acid catabolic process                                 | ARG2, DDAH1, DDAH2, GCDH, GLS, GOT1, HIBCH                             |
| Go:0045428 | Regulation of nitric oxide biosynthetic process                       | DDAH1, DDAH2, GLA, HSP90AA1                                            |



| ID         | Term                                                     | Associated Genes Found                      |
|------------|----------------------------------------------------------|---------------------------------------------|
| Go:0043648 | Dicarboxylic acid metabolic process                      | DHFR, GCLC, GLS, GOT1, L2HGDH, SDHA, SDHAF3 |
| Go:0045429 | Positive regulation of nitric oxide biosynthetic process | DDAH1, DDAH2, HSP90AA1                      |
| Go:0050999 | Regulation of nitric-oxide synthase activity             | DDAH1, DDAH2, DHFR, GLA, HSP90AA1, NOSIP    |
| Go:0009064 | Glutamine family amino acid metabolic process            | ARG2, DDAH1, DDAH2, GCLC, GLS, GOT1         |
| Go:1901606 | Alpha-amino acid catabolic process                       | ACADSB, ARG2, DDAH1, DDAH2, GCDH, GLS, GOT1 |
| Go:0006527 | Arginine catabolic process                               | ARG2, DDAH1, DDAH2                          |
| Go:0006525 | Arginine metabolic process                               | ARG2, DDAH1, DDAH2                          |
| Go:0006536 | Glutamate metabolic process                              | GCLC, GLS, GOT1                             |
| Go:0009065 | Glutamine family amino acid catabolic process            | ARG2, DDAH1, DDAH2, GLS, GOT1               |

**Table S3:** Minimum Information about a Flow Cytometry Experiment (MIFlowCyt).

| 1. Experiment Overview                                 | Details                                                                                                                                                                                                                                                                                                                                                                       |
|--------------------------------------------------------|-------------------------------------------------------------------------------------------------------------------------------------------------------------------------------------------------------------------------------------------------------------------------------------------------------------------------------------------------------------------------------|
| 1.1. Purpose                                           | To analyze cell cycle and cell death mechanisms of ACY-1215 treated OMM2.5 cells using flow cytometry.                                                                                                                                                                                                                                                                        |
| 1.2. Keywords                                          | Cell cycle, Apoptosis, Yo-Pro <sup>TM</sup> 1, Propidium Iodide                                                                                                                                                                                                                                                                                                               |
| 1.3. Experiment Variables                              | OMM2.5 cells were treated with either 0.5% DMSO, 50 $\mu$ M Etoposide, 10, 20 and 50 $\mu$ M ACY-1215 or 20 $\mu$ M Dacarbazine. Drug treated samples were analyzed at 4, 24 and 96 hours. Experiments were performed in triplicate and quadruplicate.                                                                                                                        |
| 1.4. Organization Name and Address                     | Conway Institute, University College Dublin, Belfield, Dublin 4, Ireland                                                                                                                                                                                                                                                                                                      |
| 1.5. Primary Contact Name and Email Address            | Breandán Kennedy, brendan.kennedy@ucd.ie<br>Husvinee Sundaramurthi, Husvinee.sundaramurthi@ucd.ie                                                                                                                                                                                                                                                                             |
| 1.6. Date                                              | October 2020 - December 2020                                                                                                                                                                                                                                                                                                                                                  |
| 1.7. Conclusions                                       | ACY-1215 treatment arrested cell cycle in the S phase by 24 hours post treatment. A time and dose-dependent increase in apoptotic and late-stage apoptotic cells with a decrease in percentage of viable cells was observed in ACY-1215 treated OMM2.5 cells.                                                                                                                 |
| 1.8. Quality Control Measures                          | Etoposide was used as a control for apoptosis analysis, Dacarbazine was used as a clinical control to compare against our drug of interest (ACY-1215) and vehicle control was used in each experiment. Experiments were independently performed 3 to 4 times.<br>BD Accuri <sup>TM</sup> C6 Flow Cytometer was routinely calibrated according to manufacturer's instructions. |
| 1.9. Other Relevant Experiment Information             | Not Applicable.                                                                                                                                                                                                                                                                                                                                                               |
| 2. Flow Sample/Specimen Details                        |                                                                                                                                                                                                                                                                                                                                                                               |
| Sample/Specimen Material Description                   | Details                                                                                                                                                                                                                                                                                                                                                                       |
| 2.1.1.1. Sample/Specimen Material description          | Drug treated live and post-fixed OMM2.5 cells were collected for apoptosis and cell cycle analysis, respectively, as described in Methods section.                                                                                                                                                                                                                            |
| 2.1.1.2. Biological Sample Source Description          | Established metastatic UM cell line - OMM2.5 was kindly provided by Dr. Martine Jager, Leiden, The Netherlands (Jager, M.J.; Magner, J.A.; Ksander, B.R.; Dubovy, S.R. Uveal Melanoma Cell Lines: Where do they come from? (An American Ophthalmological Society Thesis). Trans Am Ophthalmol Soc 2016, 114, T5.).                                                            |
| 2.1.1.3. Biological Sample Source Organism Description |                                                                                                                                                                                                                                                                                                                                                                               |

|                                                       |                                                                                                                                                                                                                                                                                                                                                                                                                                                                                                 |
|-------------------------------------------------------|-------------------------------------------------------------------------------------------------------------------------------------------------------------------------------------------------------------------------------------------------------------------------------------------------------------------------------------------------------------------------------------------------------------------------------------------------------------------------------------------------|
| 2.1.1.4. Other Relevant Biological Sample Information |                                                                                                                                                                                                                                                                                                                                                                                                                                                                                                 |
| 2.1.2. Environmental sample                           | Not Applicable.                                                                                                                                                                                                                                                                                                                                                                                                                                                                                 |
| 2.1.3. Other Samples                                  | Not Applicable.                                                                                                                                                                                                                                                                                                                                                                                                                                                                                 |
| 2.2 Sample Characteristics                            | Drug treated OMM2.5 cells were labeled with PI for cell cycle analysis and Yo-Pro1/PI for apoptosis analysis. Cells undergoing different stages of apoptosis, alive and dead cells are distinguished based on intensity of fluorescence.                                                                                                                                                                                                                                                        |
| 2.3. Sample Treatment Description                     | Single cell suspensions were prepared after treatment for 4, 24 or 96 hours with desired drug solutions. Samples were divided into 2 aliquots of 300 µl cell suspension solution. One aliquot of live cells was labeled with Yo-Pro1/PI for apoptosis analysis. While the 2 <sup>nd</sup> tube was fixed with 70% ethanol at 4°C for a few days. Post-fixed cells were then labelled with PI prior to analysis of cell cycle. A maximum of 50,000 events were recorded per sample for analysis. |
| 2.4. Fluorescence Reagent Description                 | YO-PRO™-1 Iodide : Molecular Probes™ by Life Technologies<br>Propidium iodide (PI) : Molecular Probes™ by Life Technologies                                                                                                                                                                                                                                                                                                                                                                     |
| <b>3. Instrument Details</b>                          |                                                                                                                                                                                                                                                                                                                                                                                                                                                                                                 |
| 3.1. Instrument Manufacturer                          | BD Biosciences ( <a href="https://www.bdbiosciences.com/en-gb">https://www.bdbiosciences.com/en-gb</a> )                                                                                                                                                                                                                                                                                                                                                                                        |
| 3.2. Instrument model                                 | BD Accuri™ C6 Flow Cytometer                                                                                                                                                                                                                                                                                                                                                                                                                                                                    |
| 3.3. Instrument configuration and settings            |                                                                                                                                                                                                                                                                                                                                                                                                                                                                                                 |
| 3.3.1. Flow Cell and Fluidics                         |                                                                                                                                                                                                                                                                                                                                                                                                                                                                                                 |
| 3.3.2. Light Sources                                  |                                                                                                                                                                                                                                                                                                                                                                                                                                                                                                 |
| 3.3.3. Excitation Optics Configuration                |                                                                                                                                                                                                                                                                                                                                                                                                                                                                                                 |
| 3.3.4. Optical Filters                                |                                                                                                                                                                                                                                                                                                                                                                                                                                                                                                 |
| 3.3.5. Optical Detectors                              |                                                                                                                                                                                                                                                                                                                                                                                                                                                                                                 |
| 3.3.6. Optical Paths                                  |                                                                                                                                                                                                                                                                                                                                                                                                                                                                                                 |
| 3.4. Other Relevant Instrument Details                |                                                                                                                                                                                                                                                                                                                                                                                                                                                                                                 |
| <b>4. Data Analysis Details</b>                       |                                                                                                                                                                                                                                                                                                                                                                                                                                                                                                 |
| 4.1. List-mode Data Files                             | FCS data files can be obtained upon request to corresponding author, post publication.                                                                                                                                                                                                                                                                                                                                                                                                          |

|                                                                                                                                              |                                                                                                                                                                                                 |
|----------------------------------------------------------------------------------------------------------------------------------------------|-------------------------------------------------------------------------------------------------------------------------------------------------------------------------------------------------|
| 4.2. Compensation Description                                                                                                                | No compensation was applied                                                                                                                                                                     |
| 4.3. Data Transformation Details                                                                                                             | No transformation was applied                                                                                                                                                                   |
| 4.4. Gating Details<br>4.4.1. Gate description<br>4.4.2. Gate statistics<br>4.4.3. Gate boundaries<br>4.4.4. Other Relevant Gate Information | A representative figure and statistical analysis have been provided in Figures X, X and Supplementary Figures X, X. For additional info please refer to Results and Methods text in manuscript. |
